# Supplementary material for: In Vitro Assembly of Multiple DNA Fragments Using Successive Hybridization
Source: PLOS journal article supplement (doi:10.1371/journal.pone.0030267), 2012-01-26
Supplement: S8 (10.1371/journal.pone.0030267.s008) [file journal.pone.0030267.s008]

## Method S1

### Cloning *Populus alba* isoprene synthase

The 105bp N' end of the original mRNA (GenBank: AB198180.1) coding a transit peptide was omitted. The remaining sequence was codon-optimized for better expression in *E. coli* using an on-line tool, OPTIMIZER (<http://genomes.urv.es/OPTIMIZER/>), and synthesized chemically.

Then it was amplified using primers ispSAs

(5'-GGAATTCCATATG<sup>NdeI</sup>AGATGTAGCGTGTCCACCGAA-3') and ispSAa (5'-

GGAAGATCT<sup>BglII</sup>TTAGCGTTCAAACGGCAGAATC-3'). The PCR product and pACYduet1

were digested with NheI and BglII and subsequently ligated together. Ligation mixtures were

transformed into *E. coli* DH5a chemical component cells, and the resulting transformants were

plated on LB agar with chloramphenicol.
